# Supplementary material for: Unconventional Names and Those Associated with Forest Environments Reduce Expectations about Juice - Contributions to the Valuation of Sociobiodiversity Products
Source: Preprints.org preprint supplement (doi:10.20944/preprints202307.1010.v1), 2023-07-14
Supplement: Supplementary file 1 [file supplementary]

**PARECER CONSUBSTANCIADO DO CEP**

**DADOS DO PROJETO DE PESQUISA**

**Título da Pesquisa:** EXPECTATIVAS A RESPEITO DE PRODUTOS ELABORADOS COM FRUTAS

**Pesquisador:** Danúbia Lins Gomes

**Área Temática:**

**Versão:** 1

**CAAE:** 47809221.8.0000.5013

**Instituição Proponente:** Instituto de Ciências Biológicas e da Saúde

**Patrocinador Principal:** Financiamento Próprio

**DADOS DO PARECER**

**Número do Parecer:** 4.786.937

**Apresentação do Projeto:**

"[...] este estudo utilizará como modelo algumas espécies frutíferas típicas de áreas de restinga. A importância deste estudo é a de contribuir através da popularização de espécies frutíferas nativas para a consolidação de dietas diversificadas e menos dependentes da produção global. Além de gerar oportunidades para comunidades rurais, cuja extração de plantas alimentícias pode contribuir para a geração de renda e diminuir a vulnerabilidade socioeconômica"

**Objetivo da Pesquisa:**

Objetivo Primário:

- Identificar fatores que influenciam na expectativa dos potenciais consumidores ao visualizarem produtos elaborados com frutíferas nativas não convencionais.

Objetivo Secundário:

- Avaliar a influência da associação a frutíferas convencionais na aceitação do araçá e cambuí;
- Avaliar a influência do rótulo "da mata" na aceitação do araçá e cambuí;
- Identificar fatores socioeconômicos e de hábitos alimentares que interferem na aceitação de Plantas Alimentícias não Convencionais por potenciais consumidores;
- Avaliar a influência do rótulo "PANC" na expectativa dos potenciais consumidores de frutíferas

**Endereço:** Av. Lourival Melo Mota, s/n - Campus A . C. Simões,

**Bairro:** Cidade Universitária

**CEP:** 57.072-900

**UF:** AL

**Município:** MACEIO

**Telefone:** (82)3214-1041

**E-mail:** comitedeeticaufal@gmail.com

Continuação do Parecer: 4.786.937

nativas não convencionais.

**Avaliação dos Riscos e Benefícios:**

**Riscos:**

Devido ao formato online, os entrevistados não correrão riscos físicos, entretanto, por ser uma pesquisa de coleta de dados há o risco de quebra de confidencialidade. Além disso, as respostas podem não ser fidedignas quanto seria presencialmente, visto que os voluntários teriam contatos com os sucos. O tempo despendido durante a entrevista, bem como o tamanho do questionário podem afetar na motivação dos entrevistados para participar do estudo.

**Benefícios:**

Contribuir oferecendo informações sobre as plantas alimentícias não convencionais, e as melhores formas de popularizar as espécies de frutíferas nativas, para que haja uma consolidação de dietas diversificadas e menos dependentes da produção global. Além de gerar oportunidades para comunidades rurais, cuja extração de plantas alimentícias pode contribuir para a geração de renda e diminuir a vulnerabilidade socioeconômica.

**Comentários e Considerações sobre a Pesquisa:**

A pesquisa possibilita o desenvolvimento sustentável da comunidade local, uma vez que o conhecimento sobre as frutas nativas permitem o consumo delas, preservando a área de restinga e gerando "oportunidades para as comunidades rurais".

**Considerações sobre os Termos de apresentação obrigatória:**

Foram analisados todos os documentos postados no Protocolo de Pesquisa

**Conclusões ou Pendências e Lista de Inadequações:**

A pesquisa não apresenta óbice ético.

**Considerações Finais a critério do CEP:**

Protocolo Aprovado

Prezado (a) Pesquisador (a), lembre-se que, segundo a Res. CNS 466/12 e sua complementar 510/2016:

O participante da pesquisa tem a liberdade de recusar-se a participar ou de retirar seu consentimento em qualquer fase da pesquisa, sem penalização alguma e sem prejuízo ao seu cuidado e deve receber cópia do TCLE, na íntegra, assinado e rubricado pelo (a) pesquisador (a) e pelo (a) participante, a não ser em estudo com autorização de declínio;

**Endereço:** Av. Lourival Melo Mota, s/n - Campus A . C. Simões,  
**Bairro:** Cidade Universitária **CEP:** 57.072-900  
**UF:** AL **Município:** MACEIO  
**Telefone:** (82)3214-1041

**E-mail:** comitedeeticaufal@gmail.com

Continuação do Parecer: 4.786.937

V.S<sup>a</sup>. deve desenvolver a pesquisa conforme delineada no protocolo aprovado e descontinuar o estudo somente após análise das razões da descontinuidade por este CEP, exceto quando perceber risco ou dano não previsto ao sujeito participante ou quando constatar a superioridade de regime oferecido a um dos grupos da pesquisa que requeiram ação imediata;

O CEP deve ser imediatamente informado de todos os fatos relevantes que alterem o curso normal do estudo. É responsabilidade do pesquisador assegurar medidas imediatas adequadas a evento adverso ocorrido e enviar notificação a este CEP e, em casos pertinentes, à ANVISA;

Eventuais modificações ou emendas ao protocolo devem ser apresentadas ao CEP de forma clara e sucinta, identificando a parte do protocolo a ser modificada e suas justificativas. Em caso de projetos do Grupo I ou II apresentados anteriormente à ANVISA, o pesquisador ou patrocinador deve enviá-las também à mesma, junto com o parecer aprovatório do CEP, para serem juntadas ao protocolo inicial;

Seus relatórios parciais e final devem ser apresentados a este CEP, inicialmente após o prazo determinado no seu cronograma e ao término do estudo. A falta de envio de, pelo menos, o relatório final da pesquisa implicará em não recebimento de um próximo protocolo de pesquisa de vossa autoria.

O cronograma previsto para a pesquisa será executado caso o projeto seja APROVADO pelo Sistema CEP/CONEP, conforme Carta Circular nº. 061/2012/CONEP/CNS/GB/MS (Brasília-DF, 04 de maio de 2012).

**Este parecer foi elaborado baseado nos documentos abaixo relacionados:**

| Tipo Documento                                            | Arquivo                                                                | Postagem            | Autor              | Situação |
|-----------------------------------------------------------|------------------------------------------------------------------------|---------------------|--------------------|----------|
| Informações Básicas do Projeto                            | PB_INFORMAÇÕES_BÁSICAS_DO_PROJETO_1181619.pdf                          | 08/06/2021 10:17:55 |                    | Aceito   |
| Folha de Rosto                                            | folha_de_rostoassinada.pdf                                             | 08/06/2021 10:16:50 | Danúbia Lins Gomes | Aceito   |
| Outros                                                    | DECLARACAO_DE_CUMPRIMENTO_DAS_NORMAS_DA_RESOLUCAO_466_12_e_5102016.pdf | 08/06/2021 10:16:22 | Danúbia Lins Gomes | Aceito   |
| TCLE / Termos de Assentimento / Justificativa de Ausência | TCLE_entrevista_online.pdf                                             | 07/06/2021 14:26:05 | Danúbia Lins Gomes | Aceito   |
| Outros                                                    | Estudo_2_para_formulario_online.docx                                   | 17/05/2021 19:24:02 | Danúbia Lins Gomes | Aceito   |

**Endereço:** Av. Lourival Melo Mota, s/n - Campus A . C. Simões,  
**Bairro:** Cidade Universitária **CEP:** 57.072-900  
**UF:** AL **Município:** MACEIO  
**Telefone:** (82)3214-1041

**E-mail:** comitedeeticaufal@gmail.com

UNIVERSIDADE FEDERAL DE  
ALAGOAS

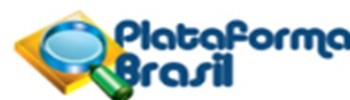

Continuação do Parecer: 4.786.937

|                                                 |                                      |                        |                    |        |
|-------------------------------------------------|--------------------------------------|------------------------|--------------------|--------|
| Outros                                          | Estudo_1_para_formulario_online.docx | 17/05/2021<br>19:23:23 | Danúbia Lins Gomes | Aceito |
| Projeto Detalhado /<br>Brochura<br>Investigador | projeto.docx                         | 17/05/2021<br>19:20:36 | Danúbia Lins Gomes | Aceito |

**Situação do Parecer:**

Aprovado

**Necessita Apreciação da CONEP:**

Não

MACEIO, 17 de Junho de 2021

Assinado por:

**CAMILA MARIA BEDER RIBEIRO GIRISH PANJWANI**  
(Coordenador(a))

**Endereço:** Av. Lourival Melo Mota, s/n - Campus A . C. Simões,

**Bairro:** Cidade Universitária

**CEP:** 57.072-900

**UF:** AL

**Município:** MACEIO

**Telefone:** (82)3214-1041

**E-mail:** comitedeeticaufal@gmail.com
